# Supplementary material
Source: ML conference proceedings conference paper supplement (https://openaccess.thecvf.com/content/ICCV2023/html/Kim_Context-Aware_Planning_and_ICCV_2023_paper.html)
Supplement: Supplementary file 1 [file Kim_Context-Aware_Planning_and_ICCV_2023_supplemental.zip]

Archive with 5 entries (5 files):
- 02210-supp.pdf
- CAP.mp4
- EAM.mp4
- noCAP.mp4
- noEAM.mp4
